# Supplementary material for: Retinoblastoma tumor suppressor protein–dependent methylation of histone H3 lysine 27 is associated with irreversible cell cycle exit
Source: PubMed Central journal article supplement — J Cell Biol. 2007 Dec 31;179(7):1399–412. doi: 10.1083/jcb.200705051 (PMC2373492; doi:10.1083/jcb.200705051), 2007-12-31
Supplement: jcellbiol_jcb.200705051_6.pdf [file jcellbiol_jcb.200705051_6.pdf]

Table S3. Sequence of DNA and RNA oligonucleotides used in this paper

| Gene           | Usage  | Size (bp) | Sequence 5'             | Sequence 3'                   |
|----------------|--------|-----------|-------------------------|-------------------------------|
| Ankrd2         | RT-PCR | 173       | CGTGAGACTCAACCGCTACA    | TCTCCAGTCCGTTCTGCTCT          |
| Beta-actin     | RT-PCR | 157       | CAGCTTCTTTGCAGCTCCTT    | CACGATGGAGGGGAATACAG          |
| B-myb          | RT-PCR | 570       | CTGGAAGTTCCTGGCCAGTCA   | ATCTCCTCCTCGCTGCTCTCCTCCTCACA |
| Brca1          | RT-PCR | 183       | CGTGCAAAAGTTTGCTGAAA    | TCTTGGATAGACCGGACCAC          |
| Ccnb1          | RT-PCR | 283       | GGCTGACCCAAACCTCTGTA    | TGCAATAAACATGGCCGTTA          |
| Ccnd1          | RT-PCR | 154       | TTGACTGCCGAGAAGTTGTG    | CTGGCATTGGAGAGGAAG            |
| Ccne1          | RT-PCR | 371       | CACCCCCACCCAGCAGTAAG    | CATGGCGTGGCCTCCTAAC           |
| Cdc2           | RT-PCR | 220       | GGGAATTGTGTTTGCCACT     | GATGTCAACCGGAGTGGAGT          |
| Cdk2           | RT-PCR | 193       | GTGGTTTGCCAGGAGTTAC     | CATCCTGGAAGAAAGGGTGA          |
| Csrp3          | RT-PCR | 150       | TGGGAAGAGCCTGGAGTCTA    | GAAAGCAGGCAGCTTCACTC          |
| Dp1            | RT-PCR | 117       | TTGTCAACACCAGCAGGAAG    | GCTTGAGCACCTCAATGTCA          |
| Mck            | RT-PCR | 120       | GATTCTCACTCGCCTTCGTC    | ACCTGTTGACTTCGGATGA           |
| Mcm3           | RT-PCR | 299       | GAGGACCAAGGCATTACCA     | CAGACCACACAGCTGAGGAA          |
| Mcm5           | RT-PCR | 99        | CATTGTCCAGGACTTCACCA    | TGCATACGGTGTGGATCTC           |
| Mef2c          | RT-PCR | 259       | TCCACCTCGGCTCTGTAAC     | CAGCTGCTCAAGCTGTCAAC          |
| Mhcllb         | RT-PCR | 117       | GCAGGACTTGGTGGACAAAC    | AGCTCGTGTGGATCTTACG           |
| Mlc1a          | RT-PCR | 276       | AAAGAAAGCAACGGCACAGT    | GGAAGGTTGTGGGTGAGAGA          |
| Myf5           | RT-PCR | 417       | AGACGCCTGAAGAAGGTCAA    | TGGAGAGAGGGAAGCTGTGT          |
| Myod1          | RT-PCR | 312       | TACAGTGGCGACTCAGATGC    | CTGGGTTCCCTGTCTGTGT           |
| Myog           | RT-PCR | 219       | CAGTGAATGCAACTCCCACA    | ACCCAGCTGACAGACAATC           |
| p107           | RT-PCR | 259       | CCGCTCTCTCCTTCCCACA     | GGCAGAGACGTTTGGCAGGT          |
| p130           | RT-PCR | 239       | TCCCCTCTCCTATCCAT       | ATCACTTCCGTCGTCCAAG           |
| pRb            | RT-PCR | 230       | AAAAAGCTGCGCTTTGACAT    | ACAACCATGAGCCAGGAGTC          |
| s26            | RT-PCR | 123       | GCCATCCATAGCAAGGTTGT    | GCCTCTTACATGGGCTTTG           |
| Uhrf1          | RT-PCR | 167       | CCTGAGCAAGGTGAAAGAGG    | AGCTGTGGTCCAGCTCAAAG          |
| RB no. 1       | siRNA  | -         | GGAGUUUGAUUCCAUAUAUU    | -                             |
| RB no. 2       | siRNA  | -         | GCAUAUCUCCGACUAAUAUU    | -                             |
| p107           | siRNA  | -         | CAAGCUAAUAGUCACGUAUDDT  | -                             |
| p130 no. 1     | siRNA  | -         | GCGAUGAUCUGGUCAUUCUU    | -                             |
| p130 no. 2     | siRNA  | -         | GCAGAAAUGCUCUACUAUAUU   | -                             |
| Ankrd1         | ChIP   | 193       | GCTTGTCATCTCCCTCTGG     | GTGGATGAACCCCTGGAAC           |
| $\beta$ -actin | ChIP   | 92        | GAGACATTGAATGGGGCAGT    | ATGAAGAGTTTTGGCGATGG          |
| B-myb          | ChIP   | 80        | GCGGGAGATAGGAAAGTGGT    | CGTGTCTGCAGGTCTGGTC           |
| brca1          | ChIP   | 181       | TGAGCCATCTTATTAGTCCCTTG | GCCTCCAACCTGAAGCAATC          |
| bub1a          | ChIP   | 150       | GCCAGTTGCCATTTATACCG    | CCCGCAGTTCTTTTCATTG           |
| Ccnd1          | ChIP   | 130       | TCCCTCCTAGCTGTCCTCT     | CGGACTGCTTCTCCTCAAAC          |
| Ccne1          | ChIP   | 115       | GCCACATTGACAAGCTTCAG    | GGTCTGCTGCCTACAGGGTA          |
| cdc25c         | ChIP   | 96        | TCATGTTCTGGTGCATGAT     | AGCCAGAGGTCTGACCATTG          |
| cdc2a          | ChIP   | 116       | GCTACCACGCCAGCTAATA     | TGTGTGTAATTTCCCTCCAAGA        |
| cdc7           | ChIP   | 123       | GTGTGAGGCCGAGAGAGAAC    | GGAAGAGTGCAGCAGAGAGG          |
| Cdca1          | ChIP   | 109       | AGTTCTGCTGCTCCAAGGAA    | CTGTGGCTGAGAATGATGA           |
| Cdk2           | ChIP   | 109       | AAGGGCTGAGCTCTCCTTG     | GGGAACCCGTGACGAAAGC           |
| Ckm            | ChIP   | 102       | AGGGATGAGAGCAGCCACTA    | CAGCCACATGTCTGGGTTAAT         |
| Diap3          | ChIP   | 258       | GTGGCGGGAGATTCAGATA     | CTGGCCACACTTACCAACT           |

|                |      |     |                          |                          |
|----------------|------|-----|--------------------------|--------------------------|
| E2F1           | ChIP | 112 | TAAGATGCCTCAGGGACCCAG    | CATTGTAGGGGTGGAGTGGGA    |
| Hoxa5          | ChIP | 86  | CCCCGAATCCTCTGTATCCT     | TTCCCTCGCAGTTCATTAG      |
| Hoxb8          | ChIP | 91  | CAACAACAGACTCCGGCTTT     | GAGGGAATTGGCTGGGTAAC     |
| Hoxd10 +0.5 kb | ChIP | 119 | GCTGAAAACCTCCCCATCTT     | CCTACTTGGCGCATTTTCTC     |
| Hoxd10 -5 kb   | ChIP | 111 | CCCCGAGTCTTGTCTGTT       | CCTTCGGGGCTGTATTGTA      |
| Id1            | ChIP | 152 | CAACAGCATCTGGGAATCCT     | TGCGGTAAACAAAAGACCC      |
| Id2            | ChIP | 171 | TGTGCAAACCCCACTAATGA     | GCCTTCTCGGAAACTCAGTG     |
| IDB3           | ChIP | 148 | TTCCCTCCTTCTTCTGCAA      | ATTTGCTGCTCGTCTGACCT     |
| Ier3           | ChIP | 180 | TGGACCATCTGCTACGTGTC     | GGAAATTCCAAGGAGGAAGC     |
| Ier5           | ChIP | 164 | CTGGGGAACGAAATGAAAGA     | GTTGGAGTTAGCCCCITTC      |
| Igfbp2         | ChIP | 90  | GGAGGAGAAAAGAAGGCAAGG    | CTTGTGGGCAACGGTAGTG      |
| Mcm3           | ChIP | 205 | GAATGCAGTGCTTCTAGCC      | CGGAAGTTTATGGTGGAGGA     |
| mcm5           | ChIP | 206 | AACCAATAGGAGCGCAGAGA     | AAGCCCGACATGACTGTACC     |
| Mef2c          | ChIP | 135 | GGGGAGAGAGCAGTTCTGTG     | TCCCTCTGCACAAGTGTCTG     |
| Myh4           | ChIP | 283 | CACCCAAGCCGGGAGAAAACAGCC | GAGGAAGGACAGGACAGAGGCACC |
| neil3          | ChIP | 95  | GGCTCAGGAAATACCGATGA     | CCTAGGTGGTGGGACTCT       |
| nqo1           | ChIP | 120 | GGACAGGGAGCAGATGAATTT    | GTTTGGGGCTGGACTAGGAC     |
| Nusap1         | ChIP | 125 | TGAAACACGGCACATCTCTC     | GAGTGGGACACTCAGGTGGT     |
| plscr1         | ChIP | 113 | GAACCGCTATTTCTGGCGTA     | CCATTCATTAGCTGTATCCCAAC  |
| Psmb1          | ChIP | 105 | CTGCCACCAAGAAAGCAAGT     | CCTGGGTCTTTGGAAGAAT      |
| rad54l         | ChIP | 120 | ACACTGCCTGGAGGCTCTTA     | AAAATCCAGGTGGGAGGAG      |
| Snai2          | ChIP | 152 | ACTCTTCCAGTTCCTGGGGT     | CTGTAGGCTCTGGCTTTTGG     |
| spbc25         | ChIP | 95  | CCATAGTTGTCCGCGAGAAT     | CCCTCAACTCCGTCTTCTG      |
| tacc3          | ChIP | 82  | CACAGGTGGCTTACGGAAG      | CGCCCCAGATTCAAATACC      |
| Tk1            | ChIP | 193 | GAAGAAATCTGGCGCTCAAC     | AGCTACGTGAAAAGCCTGGA     |
| Trim16         | ChIP | 139 | GCTCAGGAATCTTGCCCTTT     | TGGCTCAGGCTTCTCATTCT     |
| Uba52          | ChIP | 117 | GGTGATGGTAACGTGCCTTT     | ACCGCGGTGAGTACTAGGC      |
| Ube2c          | ChIP | 99  | CAAACCTAAGCGAGCCTTTG     | GTGGAGAGGAAAGGGCAACT     |
| Ube2t          | ChIP | 100 | GAGTCATTCCAACGGTCTCC     | TTCCCTCAGGTGGCACTC       |
| Uhrf1          | ChIP | 95  | CACTTGGGTCTTCAGCCACT     | CACTCTCTCTCCCTTGGA       |
| Zfp36l2        | ChIP | 95  | CTCAGGTCTCCGAGTTCAC      | GGCAGAGGAGAAGCGAGAG      |
